# Supplementary material for: Engineering polyvinyl alcohol microspheres with capability for use in photothermal/chemodynamic therapy for enhanced transarterial chemoembolization
Source: Royal Society of Chemistry journal article supplement (doi:10.1039/d3tb02868b), 2024-01-01
Supplement: d3tb02868b1.pdf [file d3tb02868b1.pdf]

## Supporting information

### Engineering a polyvinyl alcohol microspheres with functions of photothermal/chemodynamic therapy for enhanced transarterial chemoembolization

Xin Lu<sup>1,3#</sup>, Qiufang Liu<sup>1,2#</sup>, Ge Yan<sup>3</sup>, Xiao Wang<sup>1,3</sup>, Xiaosheng Liu<sup>1,2\*</sup>, Qiwei Tian<sup>4,\*</sup>,  
Shaoli Song<sup>1,2\*</sup>

1, Department of Nuclear Medicine, Fudan University Shanghai Cancer Center, Shanghai 200032, China

2, Shanghai Engineering Research Center of Molecular Imaging Probes, Shanghai 200032, China

3, College of Chemistry and Materials Science, Shanghai Normal University, Shanghai 200234, China

4, Shanghai Key Laboratory of Molecular Imaging, Shanghai University of Medicine and Health Sciences, Shanghai 201318, China

# Contributed equally

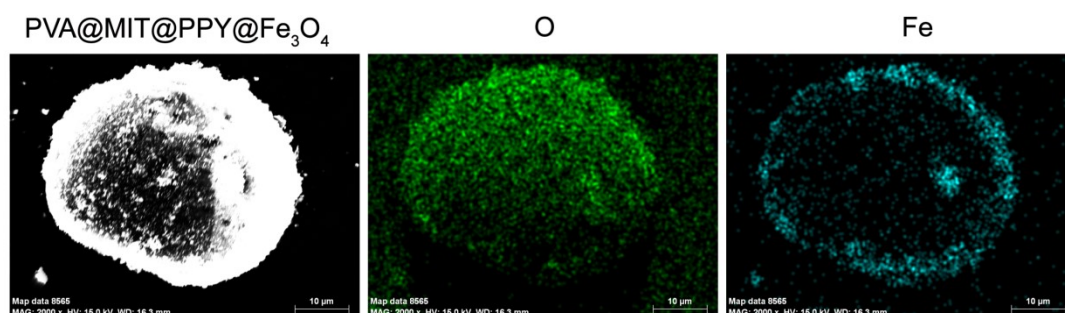

**Figure S1** The element mapping of the obtained PVA@MIT@PPy@Fe<sub>3</sub>O<sub>4</sub>

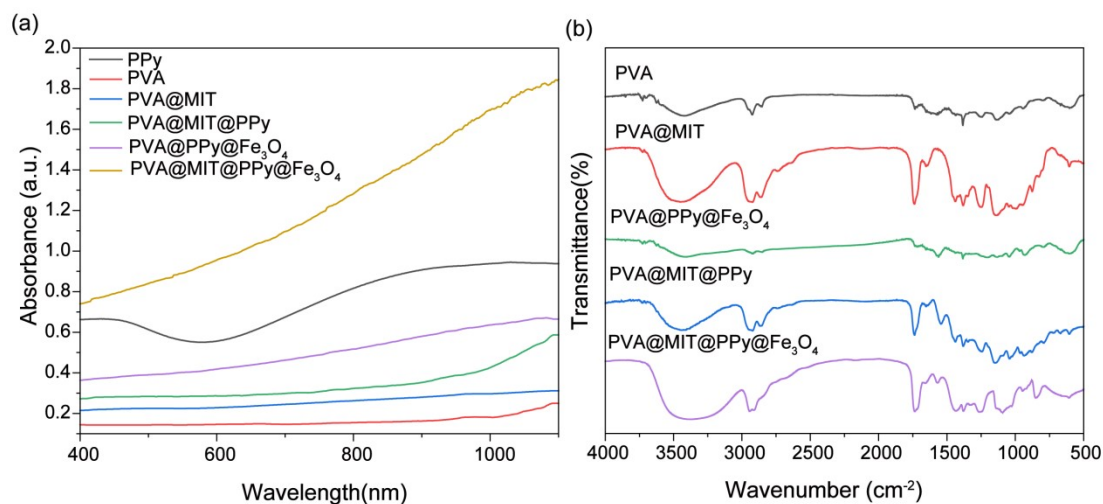

**Figure S2** (a) UV-vis-NIR spectrum and (b) FT-IR spectroscopy of the intermediates of the PVA@MIT@PPY@Fe<sub>3</sub>O<sub>4</sub>

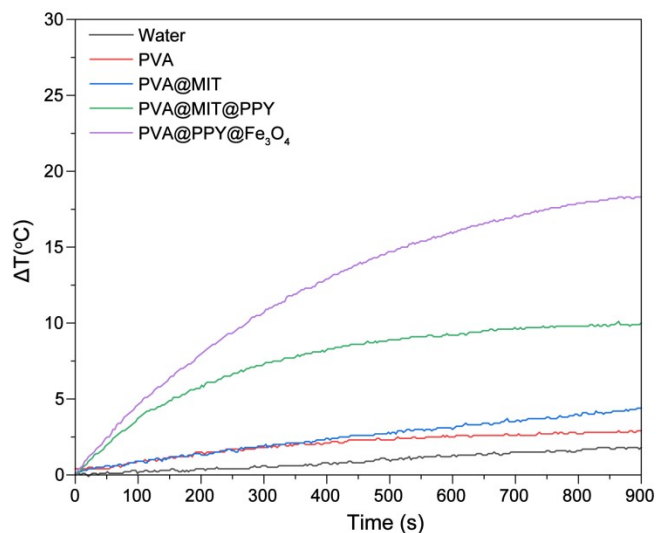

**Figure S3** Photothermal performance of the water, PVA, PVA@MIT, PVA@MIT@PPY and PVA@PPY@Fe<sub>3</sub>O<sub>4</sub> under the laser irradiation (at 1.0 W/cm<sup>2</sup>) for 900 second. The concentration for PVA and each nanoparticle is 2.5 mg/mL.

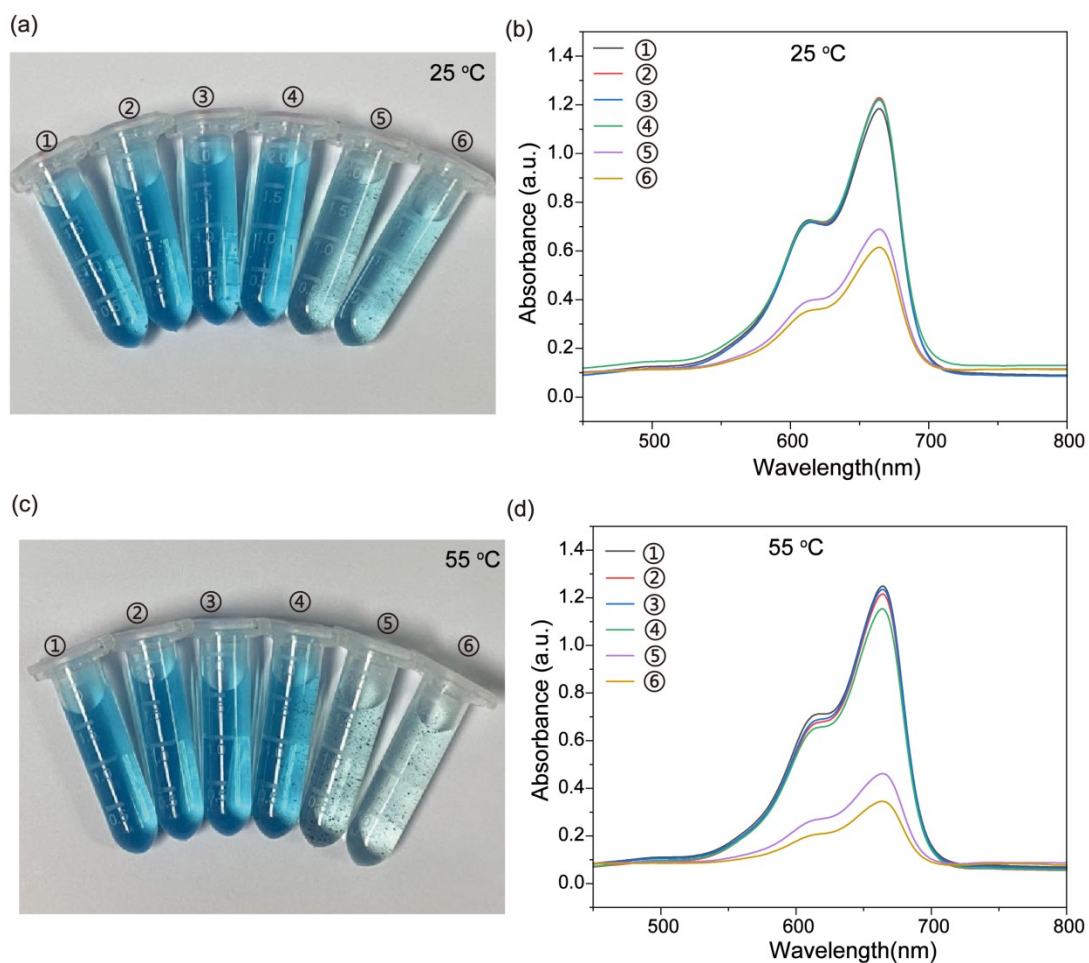

**Figure S4** CDT performance. Picture and corresponding absorbance of the ①PBS, ②PVA, ③PVA@MIT, ④PVA@MIT@PPY, ⑤PVA@PPY@Fe<sub>3</sub>O<sub>4</sub>, ⑥PVA@MIT@PPY@Fe<sub>3</sub>O<sub>4</sub> mixed with MB at 25 (a, b) and 55 °C (c, d).

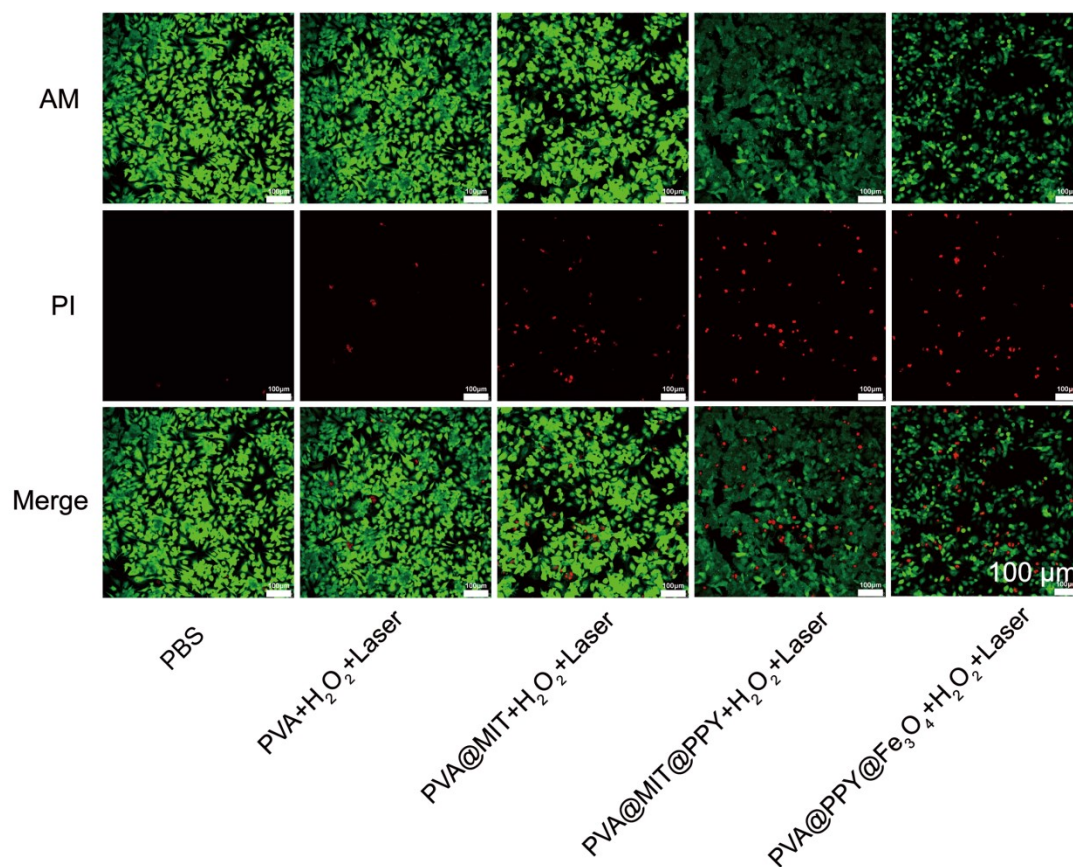

**Figure S5** Synergy therapy performance of PMPF microspheres in vitro. Confocal images of the cells dyed by AM (green color) and PI (red color) after being treated by different conditions for PBS, PVA, PVA@MIT, PVA@MIT@PPY, PVA@PPY@Fe<sub>3</sub>O<sub>4</sub> group.

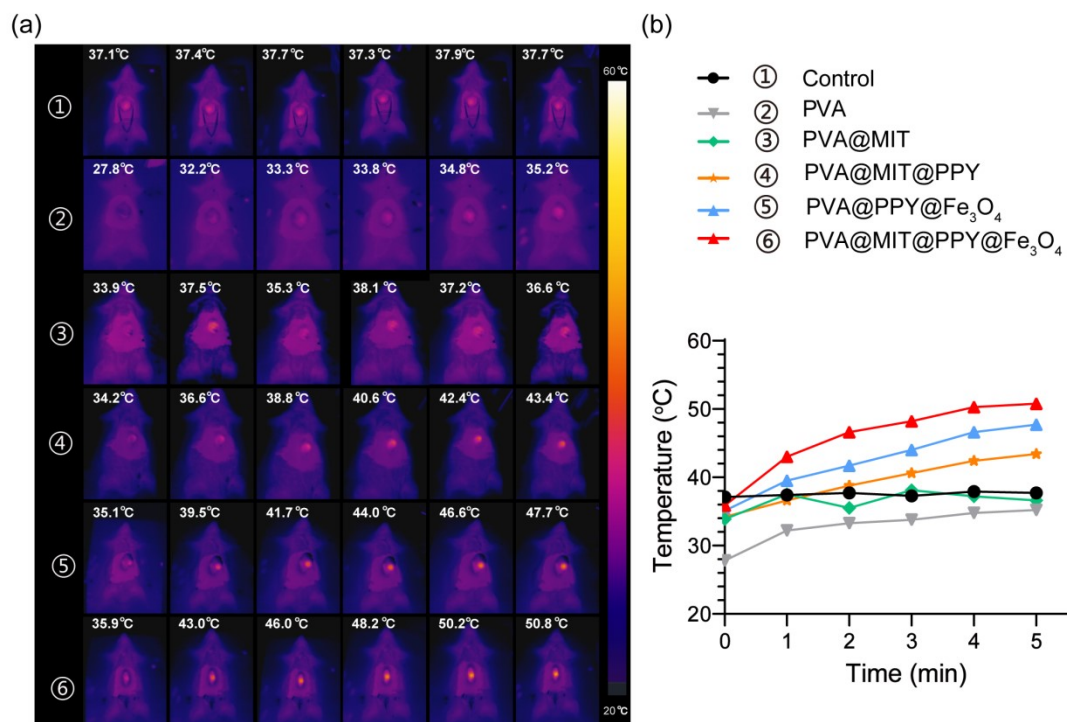

**Figure S6** (a) Thermal images and (b) corresponding temperatures at the tumor site of rats in the different groups before and after laser irradiation at different time points (1-5 min).
